# Supplementary material for: A multifunctional nanopipette for metal ion recognition and ultra-trace analysis
Source: Royal Society of Chemistry journal article supplement (doi:10.1039/d3nj00560g), 2023-01-01
Supplement: d3nj00560g1.pdf [file d3nj00560g1.pdf]

## Supporting Information

# Multifunctional Nanopipette for Metal Ion Recognition and Ultra-trace Analysis

Kang Wang<sup>1</sup>, Gongming Qian<sup>2</sup>, Yunchuan Li<sup>1</sup>, Ruixia Wang<sup>1</sup>, Jing Guo<sup>1\*</sup>

<sup>1</sup>The State Key Laboratory of Refractories and Metallurgy, and Institute of Advanced Materials and Nanotechnology, Wuhan University of Science and Technology, Wuhan 430081, China

<sup>2</sup>College of Resource and Environmental Engineering, Wuhan University of Science and Technology, Wuhan 430081, China

\*E-mail: [jguo008@outlook.com](mailto:jguo008@outlook.com)

### Table of Content

|                                                                   |   |
|-------------------------------------------------------------------|---|
| S1. Au nanoelectrode characterization.....                        | 1 |
| S2. TA modification of Au NE/NP.....                              | 2 |
| S3. I-V curves of Au NE/NP-TA in the same valent metal ions ..... | 3 |
| S4. CV curves of different metal ions.....                        | 3 |
| S5. I-V curves of different valent metal ions .....               | 3 |
| S6. Regeneration of Au NE/NP-TA .....                             | 4 |
| S7. Stability of Au NE/NP-TA.....                                 | 4 |

### S1. Au nanoelectrode characterization

The fabricated Au nanoelectrodes were characterized by cyclic voltammetry (CV). We estimated the exposed areas of insulated Au nanoelectrodes based on CVs (Figure S1). The steady-state CVs of the Au nanoelectrodes were recorded in 1 M KCl solution containing 100 mM using an electrochemical workstation (CHI760E, CHI Instruments, Inc., USA). The diffusion-limited current  $i_d$  is calculated using equation S1,

$$i_d = mFDC\sqrt{2\pi A_{eff}}, \text{ (equation S1)}$$

where  $A_{eff}$  is the exposed area,  $m$  is a geometry factor,  $F$  is the Faraday constant (96485 C/mol),  $D$  and  $C$  is the diffusion constant ( $7.4 \times 10^{-6}$  cm<sup>2</sup>/s) and bulk concentration (100 mM) of Ferrocyanide ions, respectively. We used  $m=1$  for the calculation. Figure S1 shows the range of  $i_d$  is from 1.0 to 3.3 nA. According to equation S1 and  $i_d$ , and the exposed area of the Au nanoelectrodes is between 0.003 and 0.03  $\mu\text{m}^2$ .

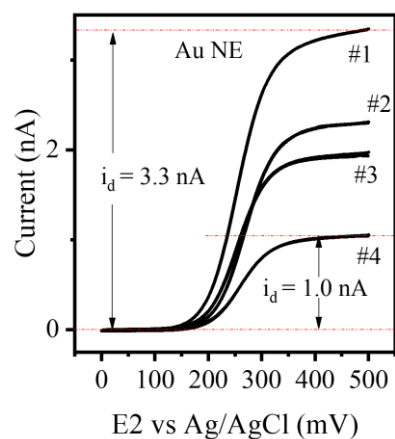

**Figure S1.** The CVs of four different Au NE/NP nanopipettes in 1M KCl with 100mM  $\text{Fe}(\text{CN})_6^{4-}$  and the sweep rate is 100 mV/s.

## S2. TA modification of Au NE/NP

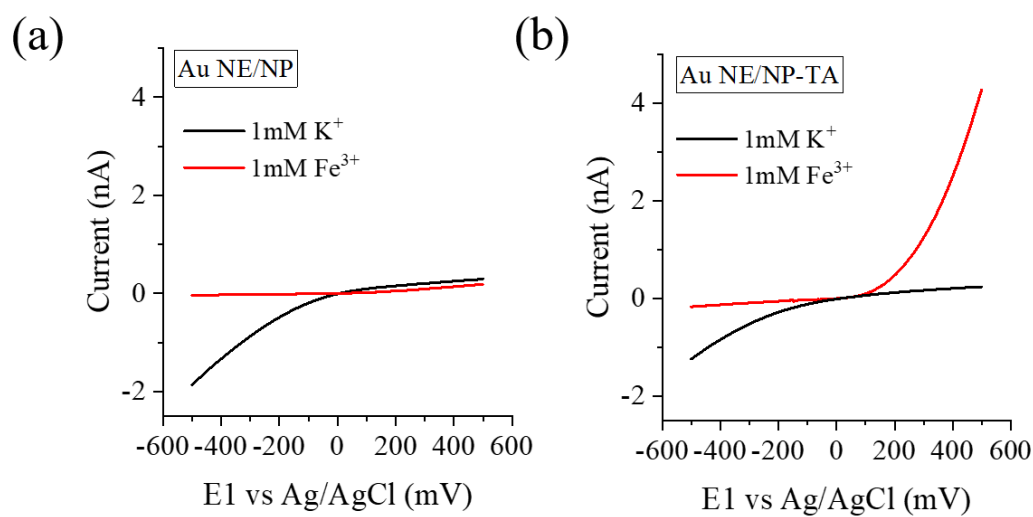

**Figure S2.** (a)  $I$ - $V$  curves of Au NE/NP in the 1 mM  $\text{K}^+$  and 1 mM  $\text{Fe}^{3+}$ . (b)  $I$ - $V$  curves of Au NE/NP-TA in the 1 mM  $\text{K}^+$  and 1 mM  $\text{Fe}^{3+}$ .

### S3. I-V curves of Au NE/NP-TA in the same valent metal ions

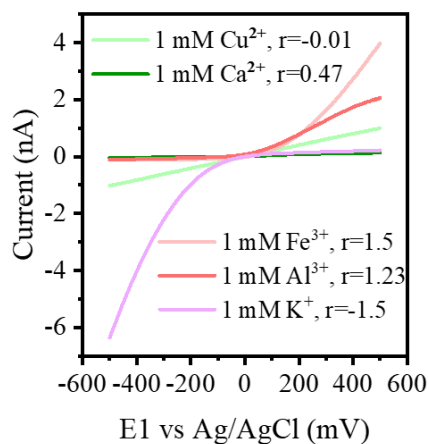

Figure S3. *I-V* curves of Au NE/NP-TA in metal ions with different valent.

### S4. CV curves of different metal ions

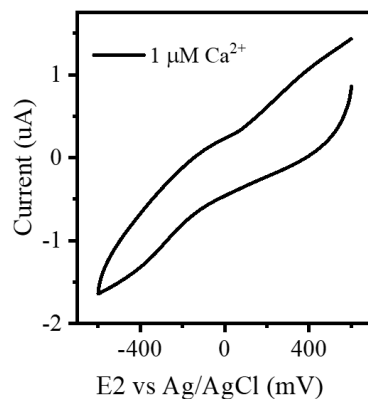

Figure S4. CV curves of Au NE/NP-TA in  $1 \mu\text{M Ca}^{2+}$ .

### S5. I-V curves of different valent metal ions

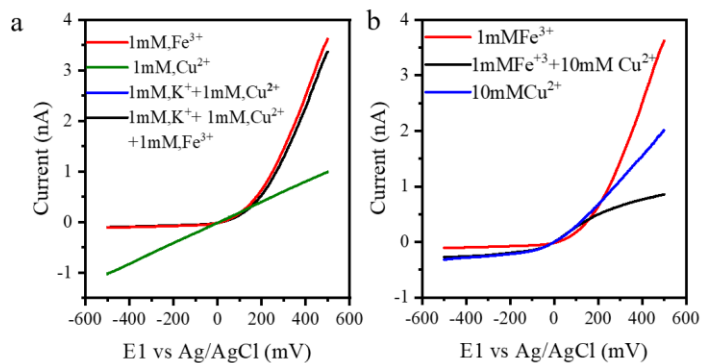

Figure S5. (a) *I-V* curves of Au NE/NP-TA in the solution of  $\text{Fe}^{3+}$  (red line), a mixture of  $\text{K}^{+} + \text{Cu}^{2+} + \text{Fe}^{3+}$  (black

line), and a mixture of  $K^+ + Cu^{2+}$  (blue line), respectively. Note the blue and green lines are overlapped. (b)  $I-V$  curves of Au NE/NP-TA in the 1 mM  $Fe^{3+}$  (red line), 1 mM  $Fe^{3+} + 10$  mM  $Cu^{2+}$  (black line), and 10 mM  $Cu^{2+}$  (blue line). Note that, all the metal ion concentration is 1 mM and the bath solution pH is 4.

### S6. Regeneration of Au NE/NP-TA

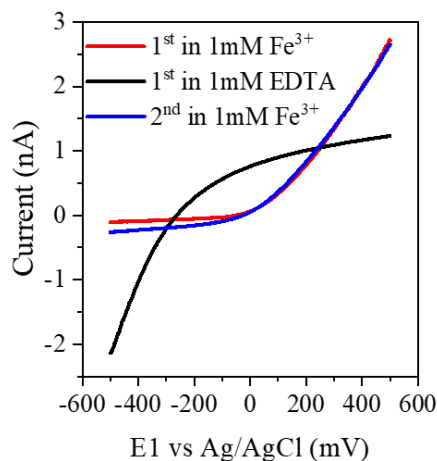

**Figure S6.**  $I-V$  curves of Au NE/NP-TA in the 1 mM  $Fe^{3+}$  and EDTA, alternatively.

### S7. Stability of Au NE/NP-TA

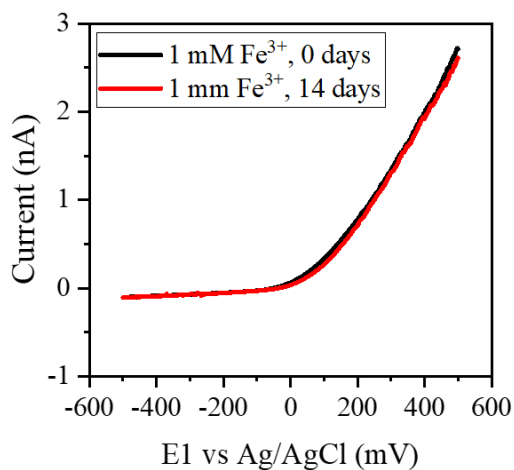

**Figure S7.**  $I-V$  curves of Au NE/NP-TA in the 1 mM  $Fe^{3+}$  with a storage time of 0 and 14 days. The tip of Au NE/NP-TA was stored in 10 mM PBS.
